# Supplementary material
Source: PubMed Central journal article supplement (PMC3241772)

*H. erato*

*H. melpomene*

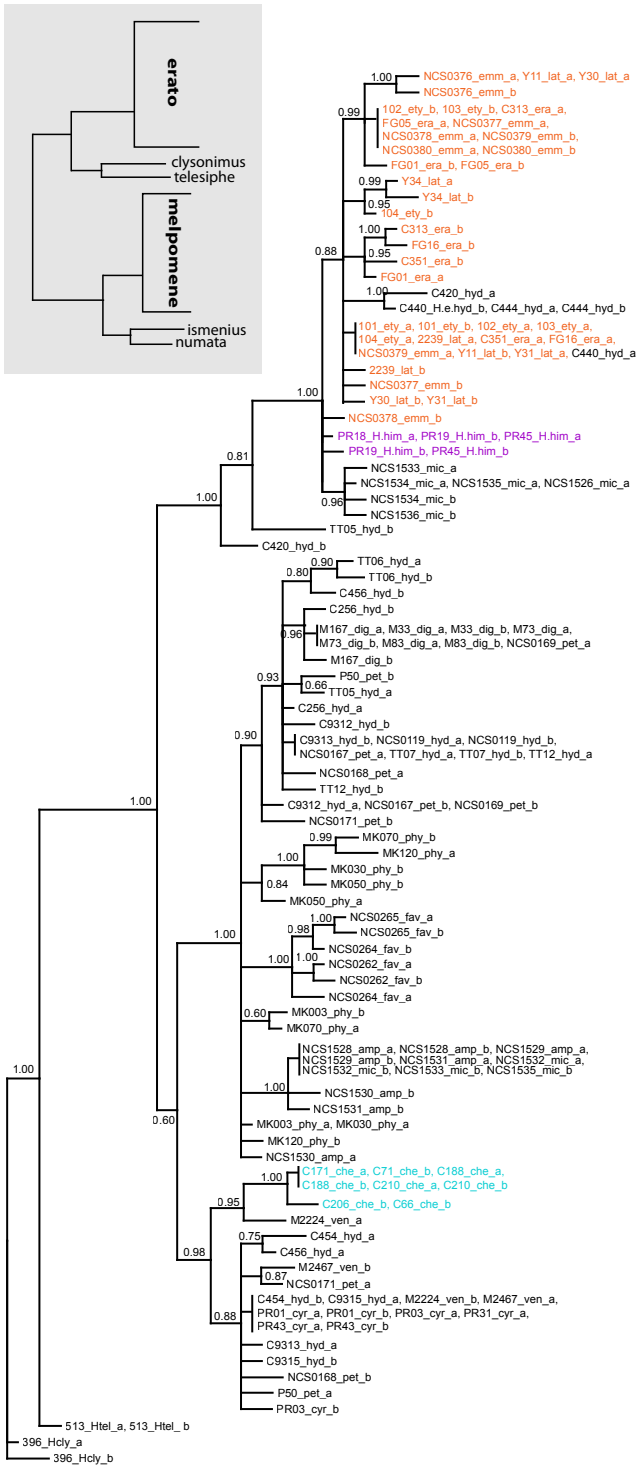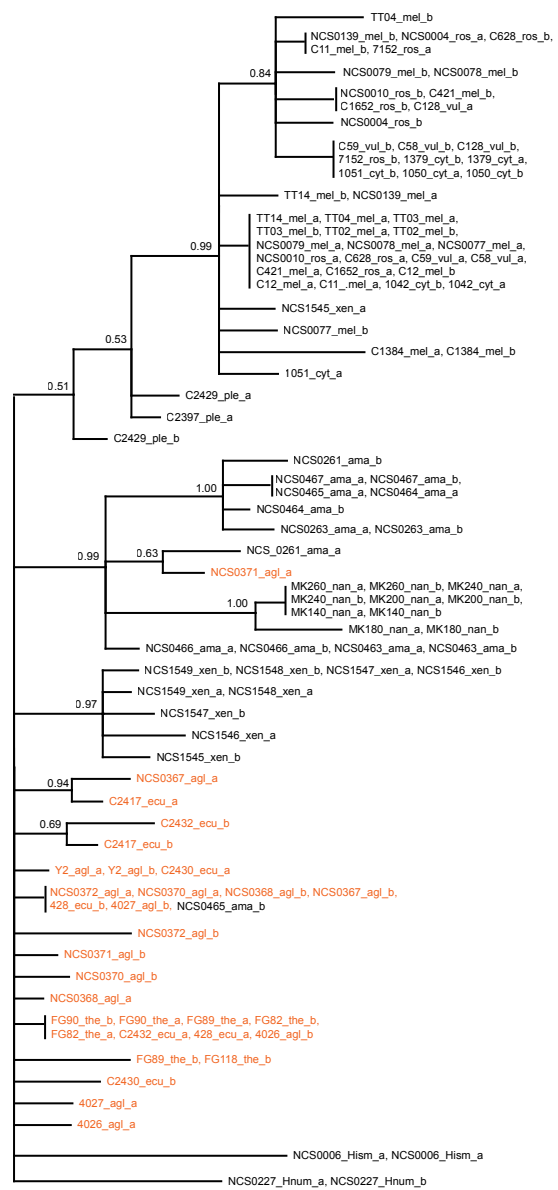

**Side Bar - Geography:**

|           |           |                   |                  |
|-----------|-----------|-------------------|------------------|
|           |           |                   |                  |
| Caribbean | Amazonian | Chocoo/<br>Parana | <i>H. himera</i> |

**Taxon Names - Color Pattern:**

A.

**kinesin (Linked)**

*H. erato*

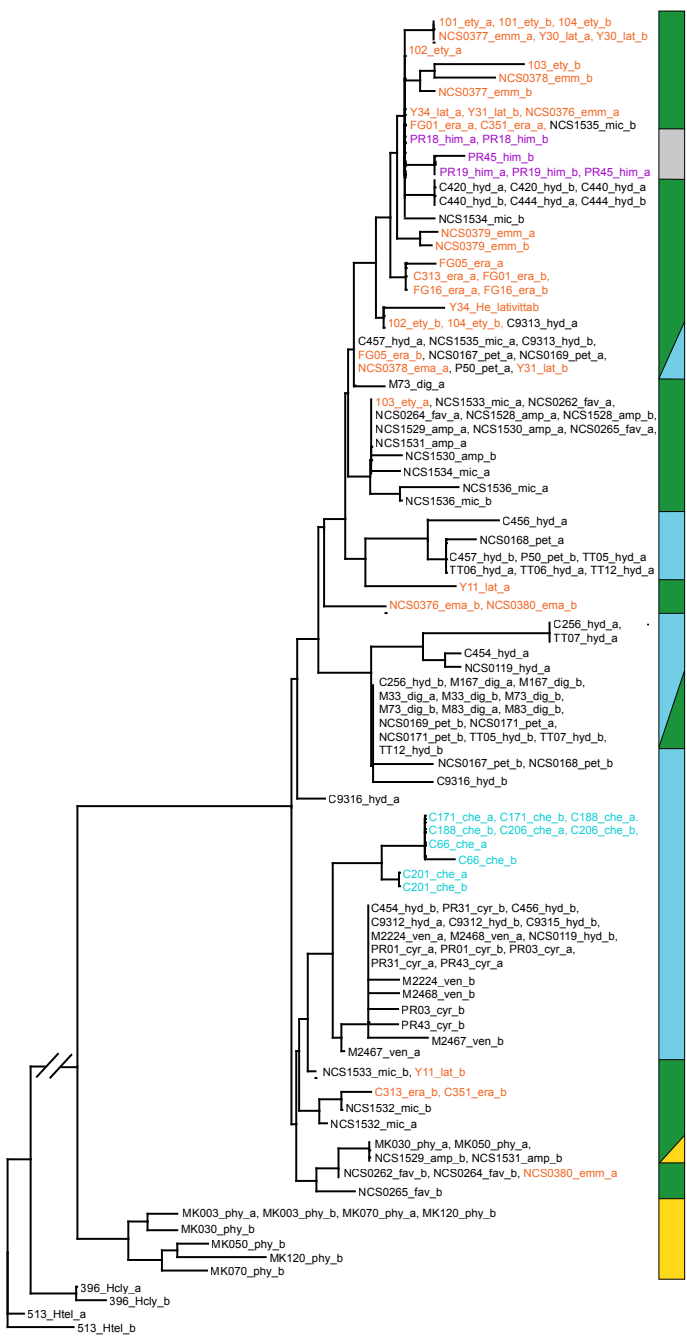

*H. melpomene*

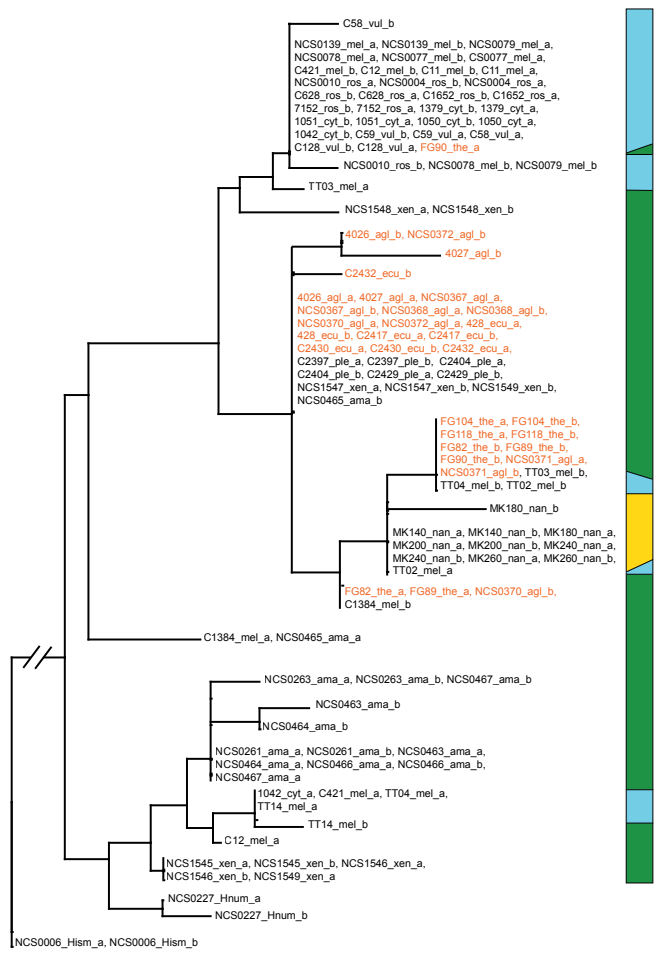

B.

# bves (Linked)

## *H. erato*

## *H. melpomene*

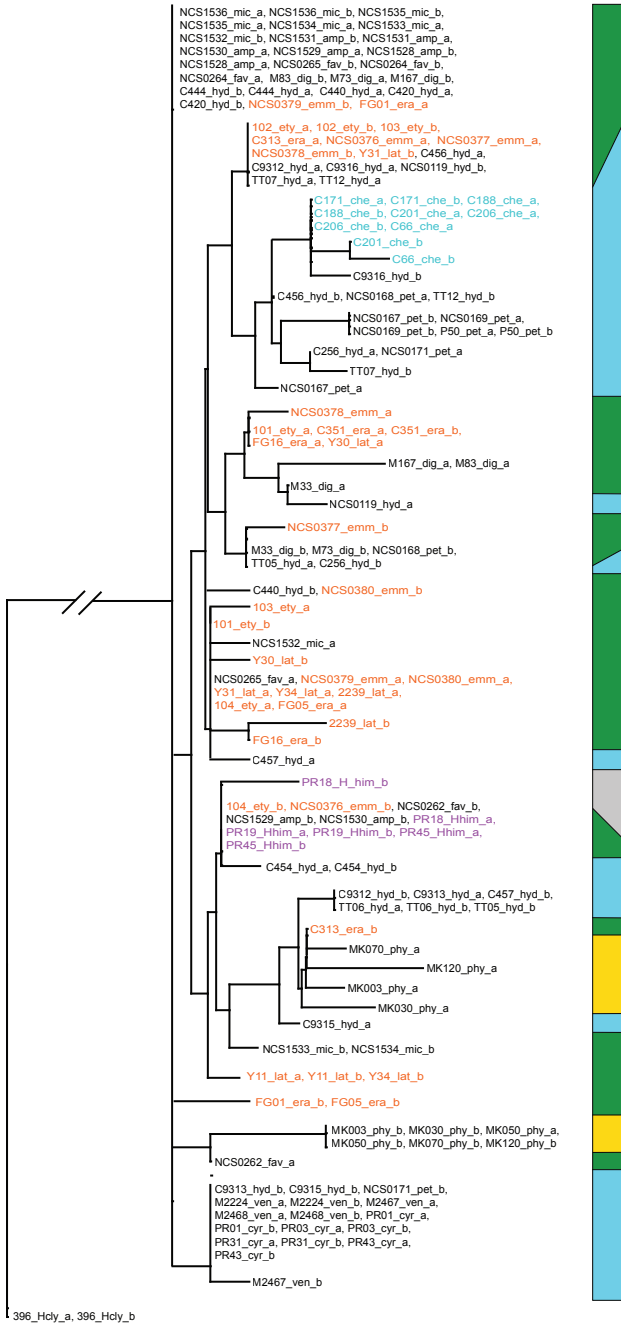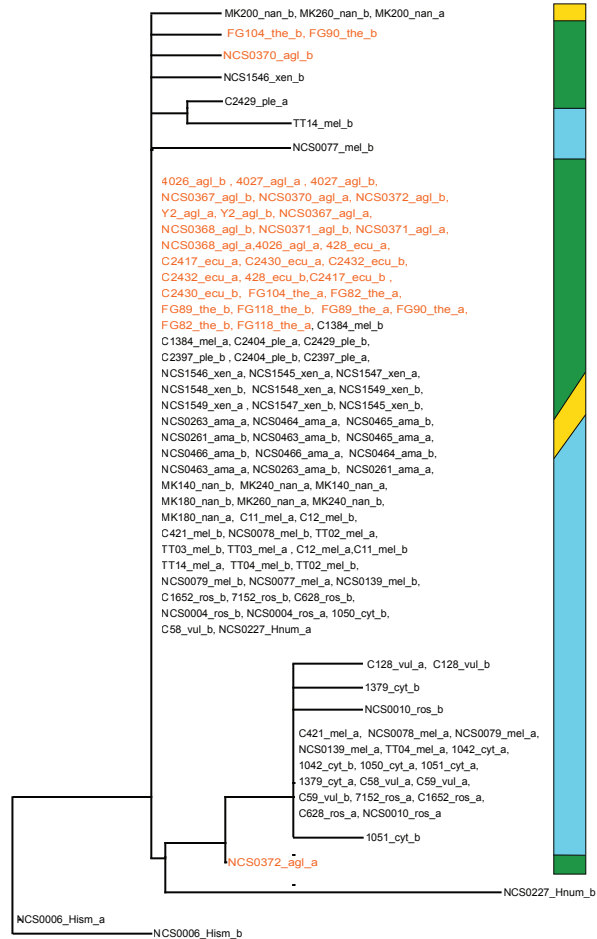

GPCR (Linked)

*H. erato*

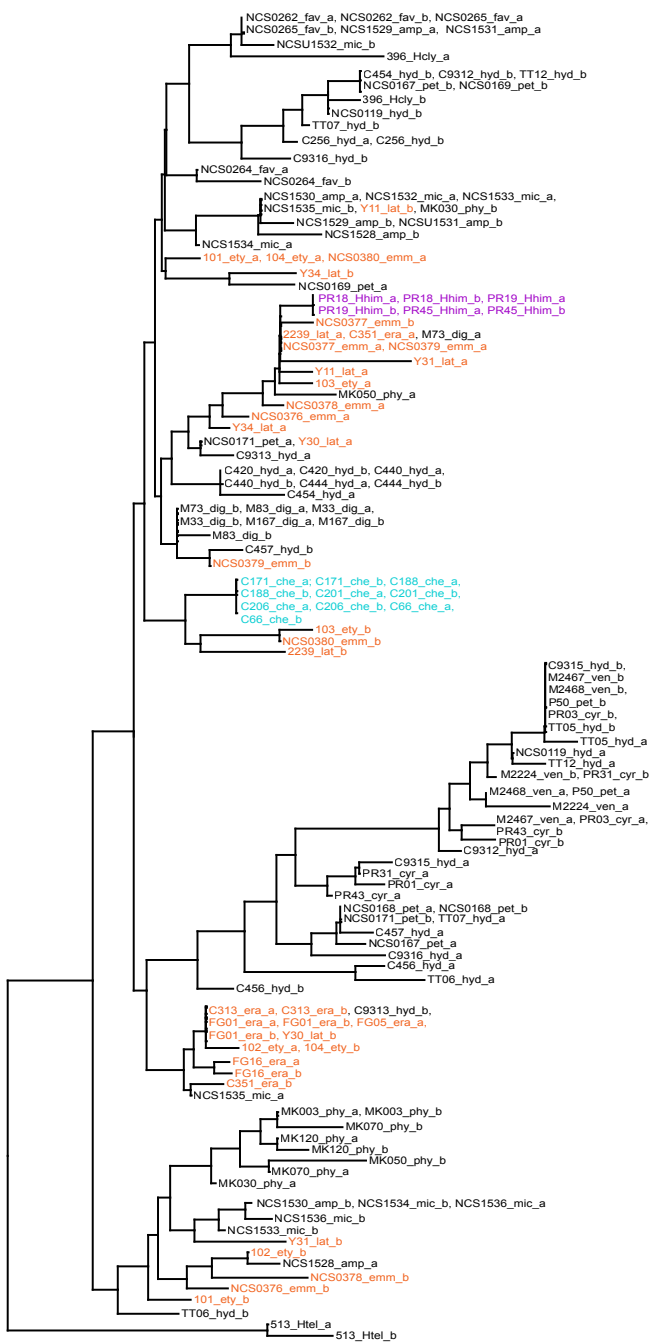

*H. melpomene*

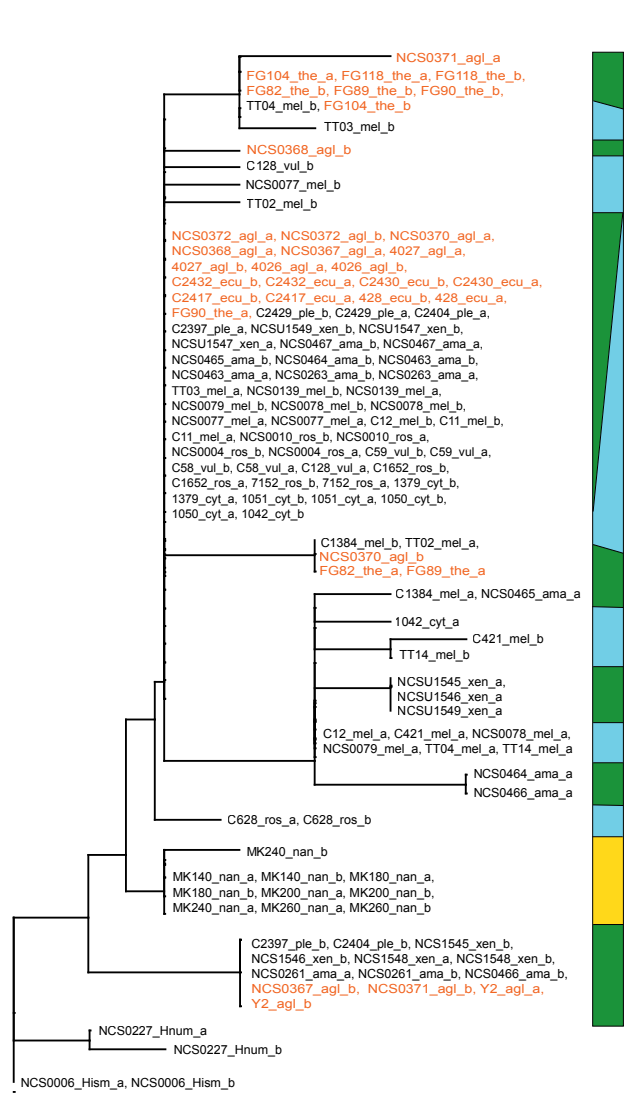

D.

# VanGogh (Linked)

## *H. erato*

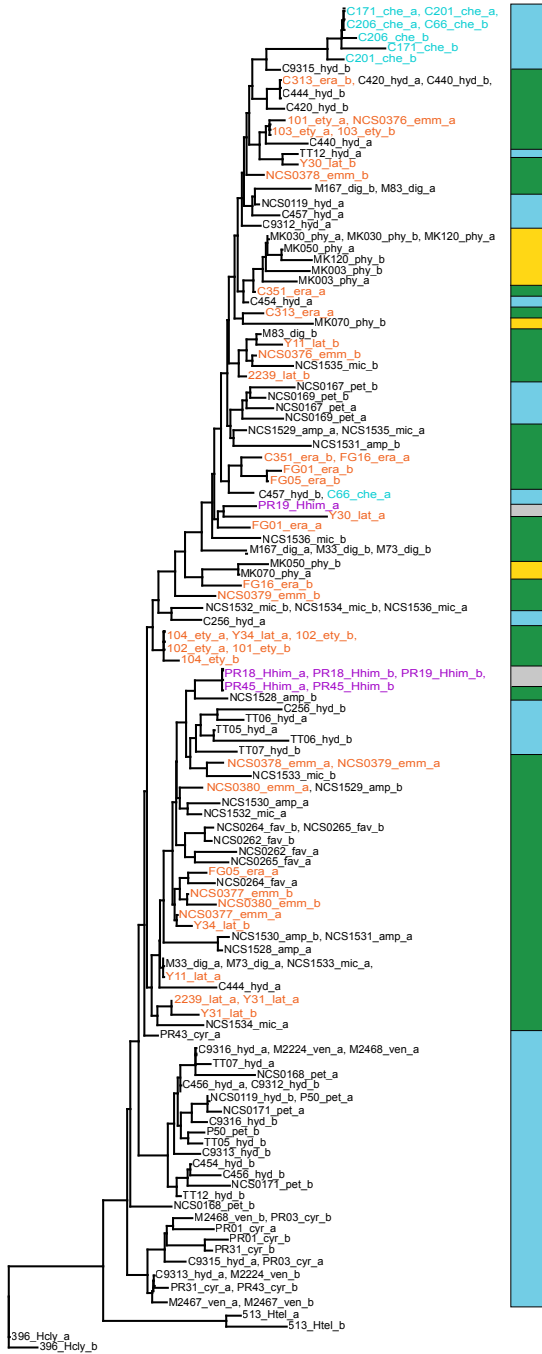

## *H. melpomene*

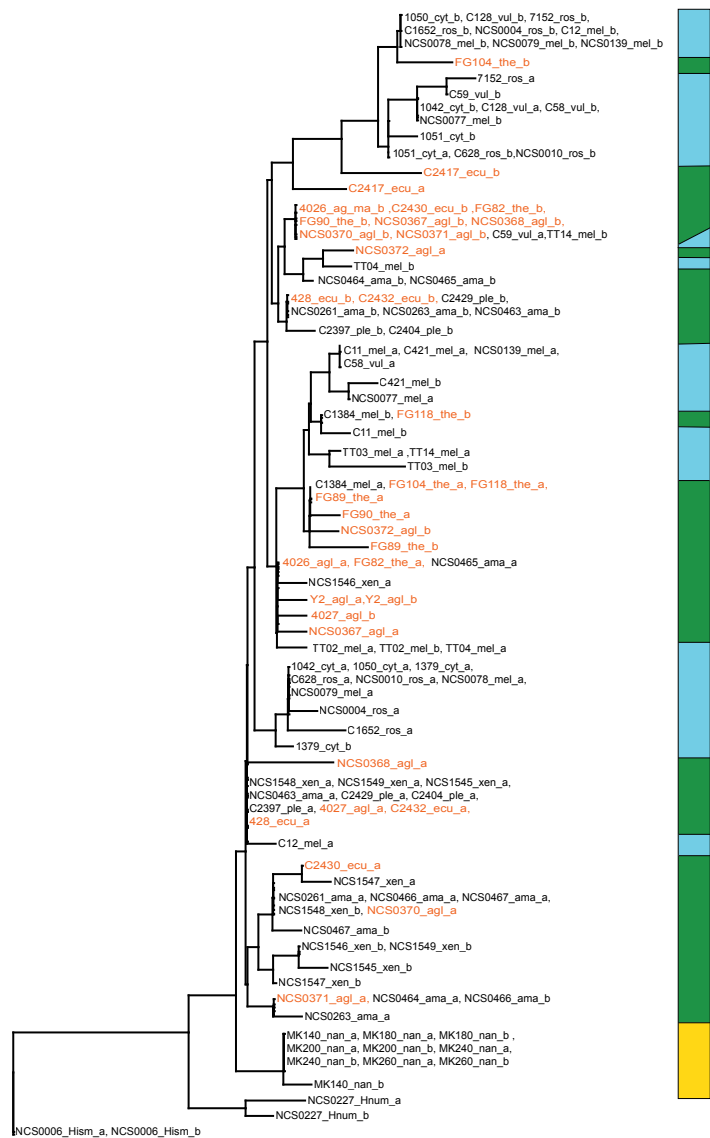

E.

*mt-COI-COII (Unlinked)*

*H. erato*

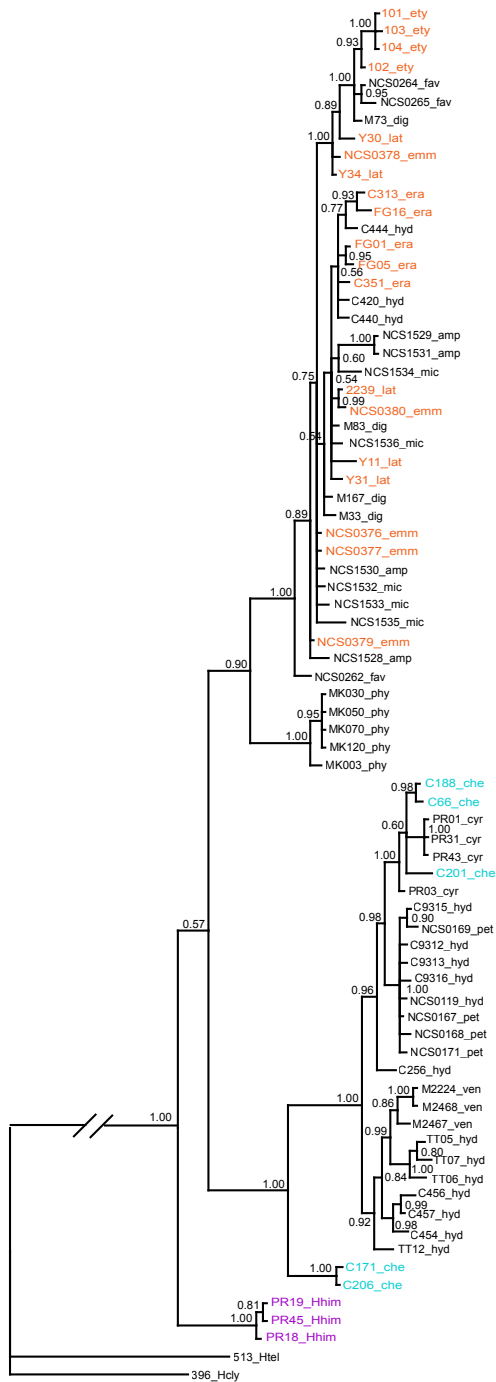

*H. melpomene*

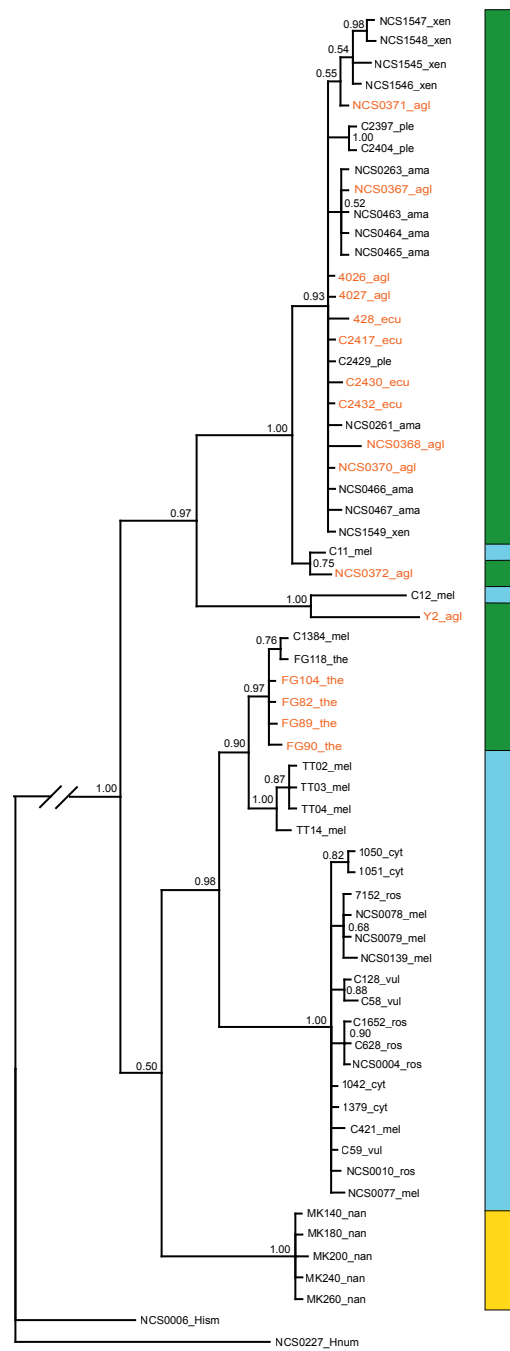

F.

CAT (Unlinked)

*H. erato*

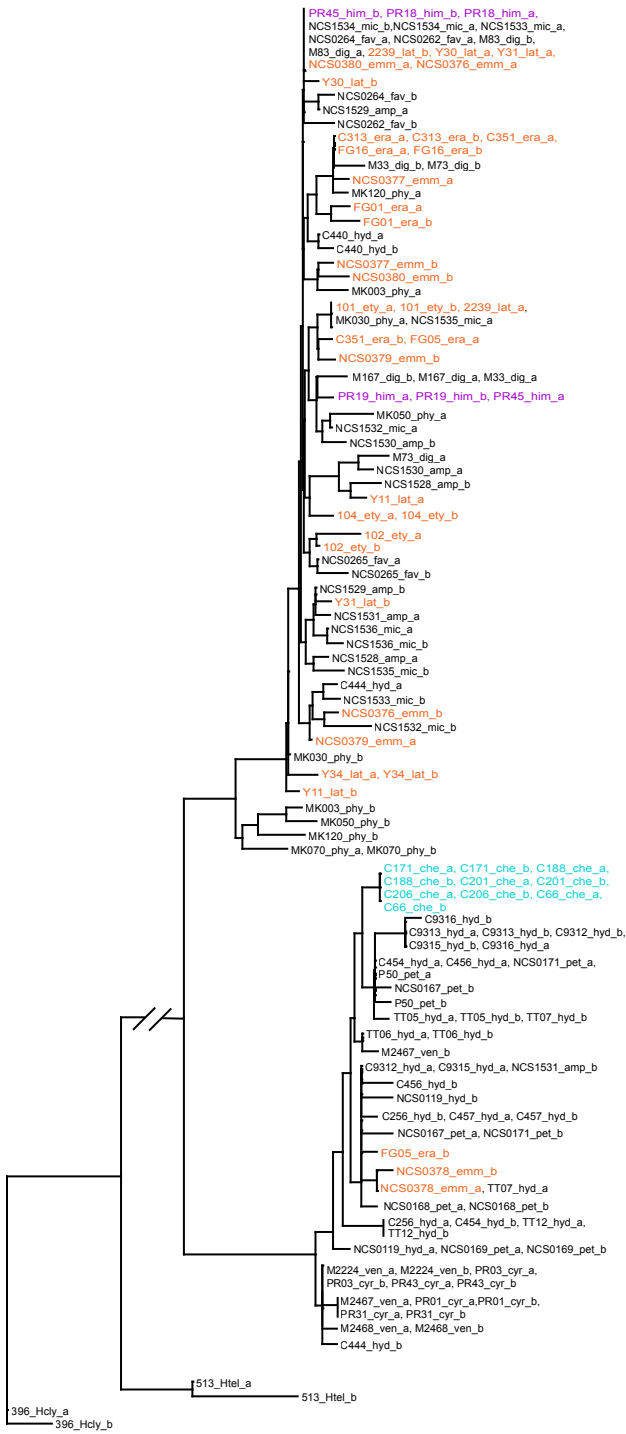

*H. melpomene*

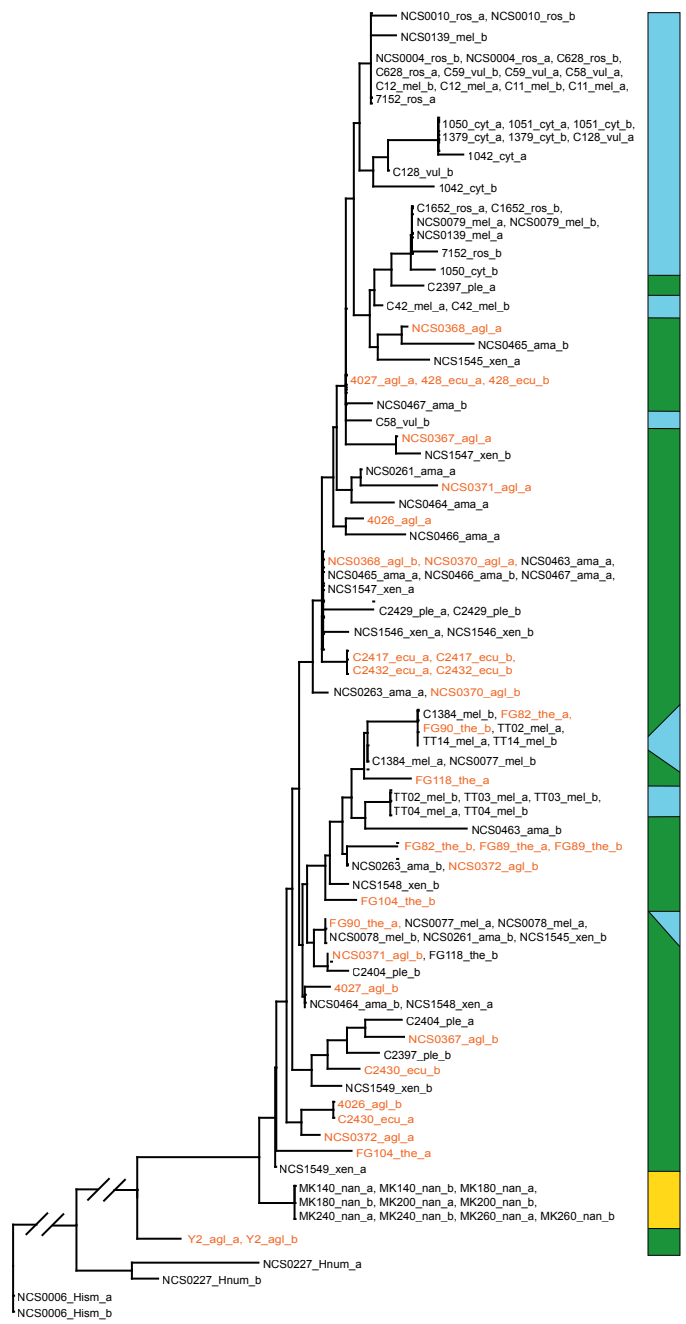

2654 (Unlinked)

*H. erato*

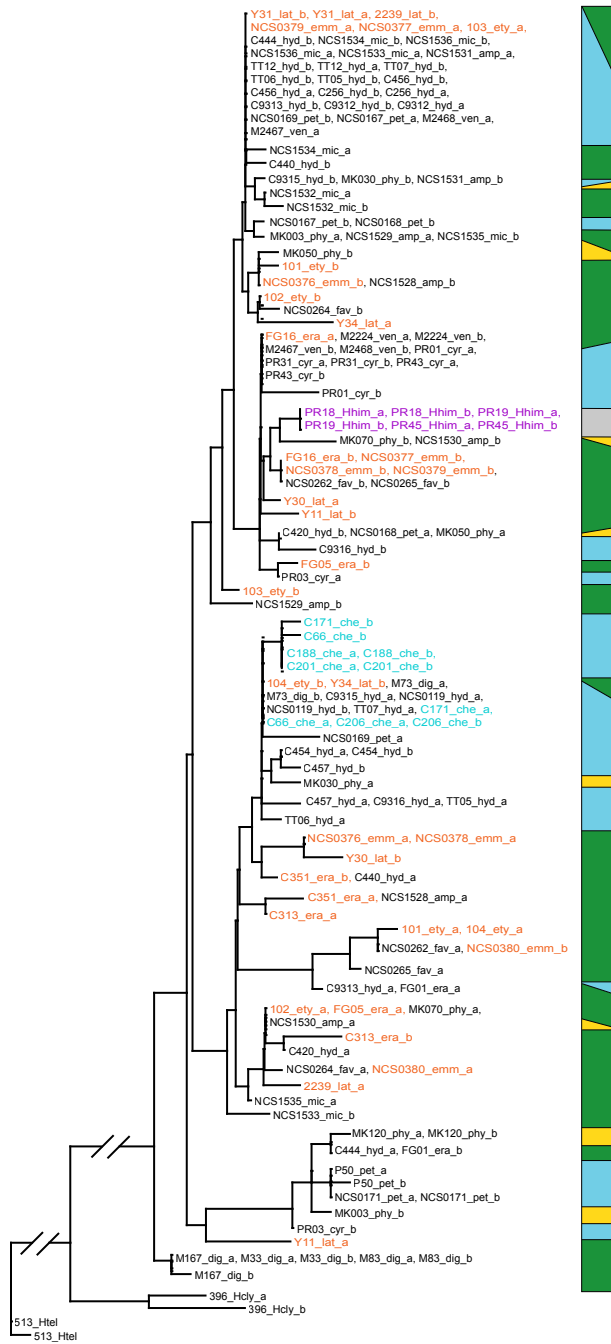

*H. melpomene*

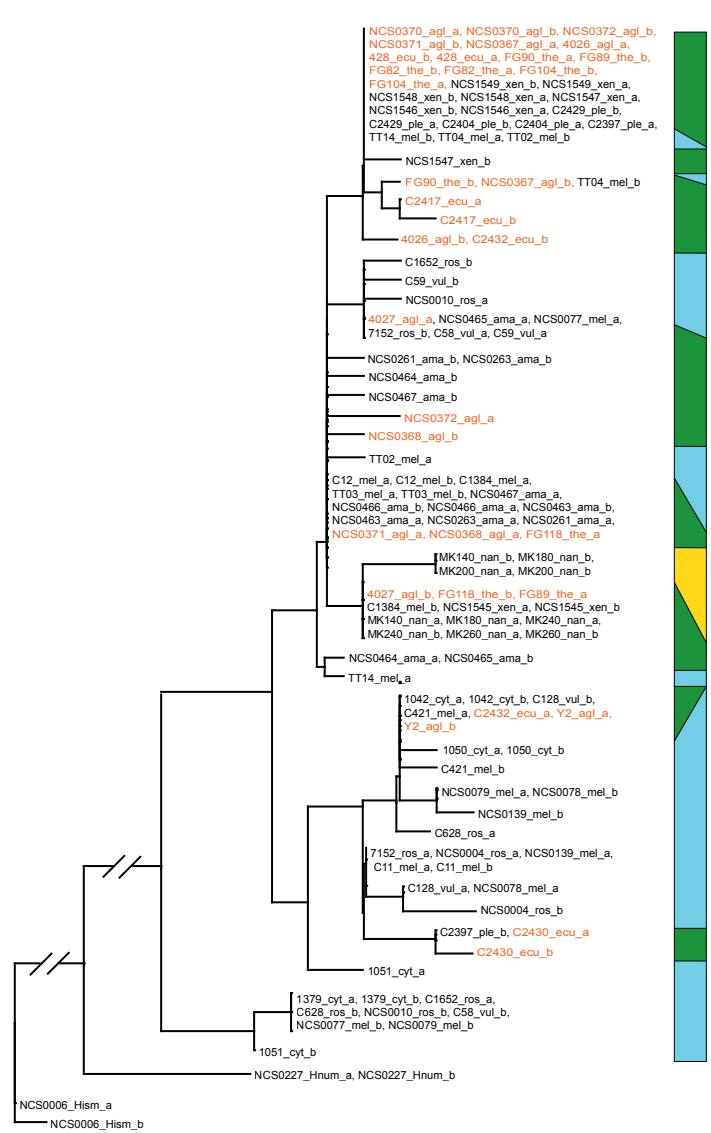

H.



# SUMO (Unlinked)

## *H. erato*

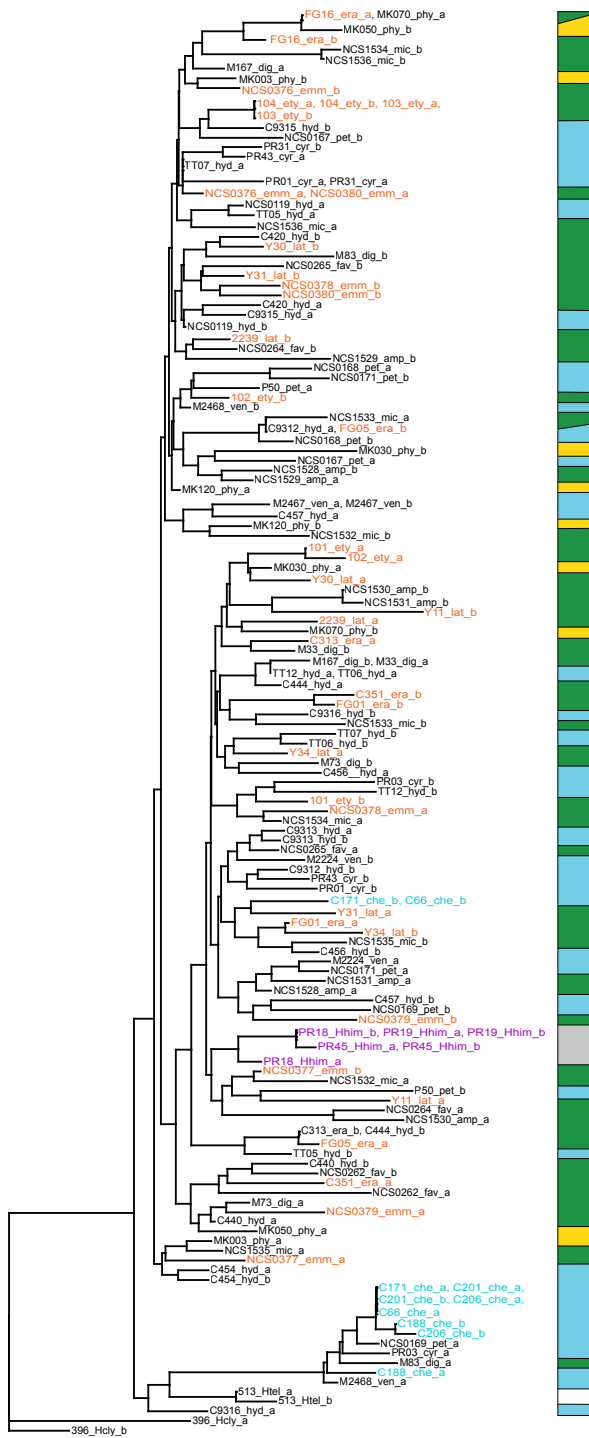

## *H. melpomene*

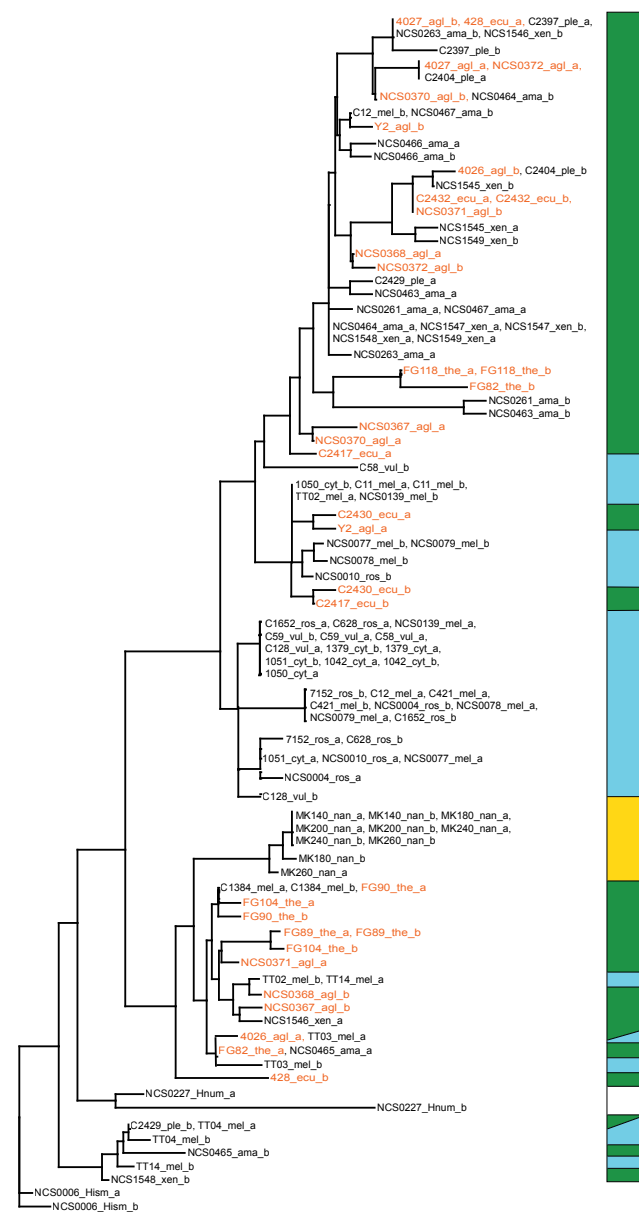

I.

# Suz12 (Unlinked)

## *H. erato*

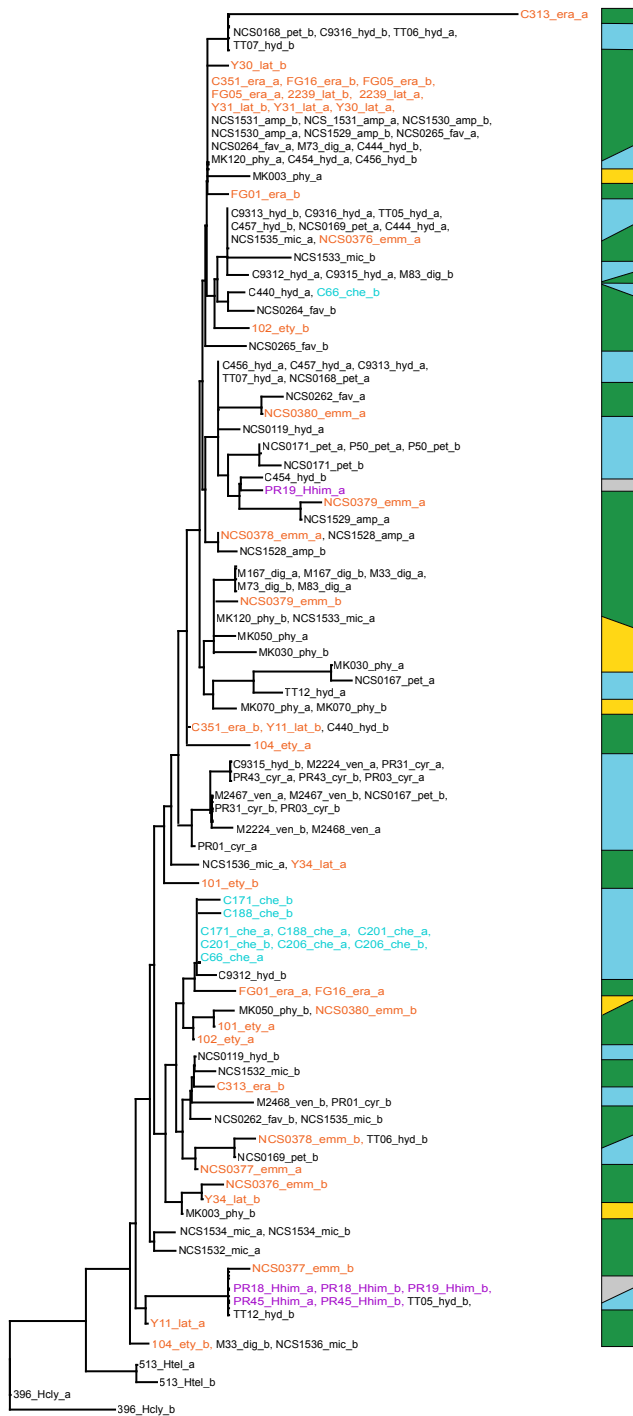

## *H. melpomene*

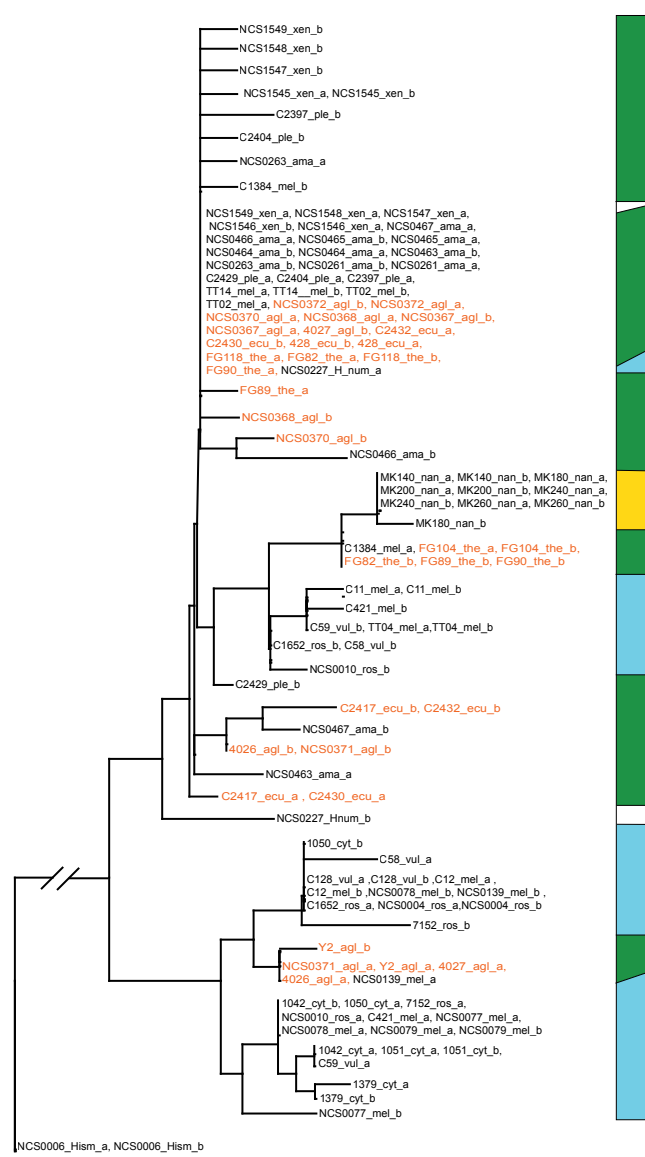

Supplement: 1110096108_sfig01.pdf [file 1110096108_sfig01.pdf]
